# Supplementary material
Source: HighWire-hosted journal article supplement (https://www.annfammed.org/highwire/filestream/8818/field_highwire_adjunct_files/0/Cantone_Suppl.pdf)
Supplement: Cantone_Suppl.pdf [file Cantone_Suppl.pdf]

## Supplemental materials for:

**Cantone R, Fleishman J, Garvey B, Gideonse N.  
Interdisciplinary management of opioid use disorder in  
primary care. *Ann Fam Med.* 2018;16(1):83.**

Rebecca E. Cantone, MD<sup>1</sup>

Joan Fleishman, PsyD<sup>2</sup>

Brian Garvey, MD, MPH<sup>1</sup>

Nicholas Gideonse, MD<sup>2</sup>

<sup>1</sup>OHSU Scappoose Family Medicine Clinic, Scappoose, Oregon

<sup>2</sup>OHSU Family Medicine at Richmond, Portland, Oregon

**Funding support:** FQHC – DHHS HRSA16074 Substance Use Disorder Treatment Expansion, Grant: 6 H80CS241610404. RHC- No initial funding until program established. Columbia County Coordinated Care Organization provided additional funding for hiring, and we then received a grant from The Substance Abuse and Mental Health Services Administration (1H79TI026752-01 – Expanding MAT Capacity Across Oregon).

**Prior presentations:** Nick Gideonse, MD; Joan Fleishman; Amanda Risser, MD. Scaling Up: Expanding Access to Medication Assisted Treatment of Substance Use Disorders With Team-Based Care. STFM Conference on Practice Improvement, Newport Beach, California, 2017.

## References

1. Korthuis PT, McCarty D, Weimer M, Bougatsos C, Blazina I, Zakher B, et al. Primary care-based models for the treatment of opioid use disorder: a scoping review. *Ann Intern Med.* 2017;166:268–278.
